CORRECTION

# Correction: Evolution of Self-Organized Task Specialization in Robot Swarms

The PLOS Computational Biology Staff

The funding statement for this article should read as follows:

“EF acknowledges the Fund for Scientific Research (FWO)–Flanders (grant 12N7515N). EF, AET and TW acknowledge the European Science Foundation “H2Swarm” program (<http://www.esf.org/>) and the KU Leuven ([www.kuleuven.be](http://www.kuleuven.be)) for the IDO-BioCo3 project and KU Leuven Excellence Center project PF/2010/007. EDG acknowledges the KU Leuven for the Grant F+/11/033. MD acknowledges the Fonds de la Recherche Scientifique—FNRS (F.R.S.—FNRS—[www.fnrs.be](http://www.fnrs.be)) and the European Research Council (ERC—[erc.europa.eu](http://erc.europa.eu)) ERC Advanced Grant “E-SWARM: Engineering Swarm Intelligence Systems” (grant 246939). AET acknowledges the Scientific and Technological Research Council of Turkey (Tubitak—[www.tubitak.gov.tr/en](http://www.tubitak.gov.tr/en)) grant TUBITAK-2219. The funders had no role in the study design, data collection and analysis, decision to publish, or preparation of the manuscript.”

## Reference

1. Ferrante E, Turgut AE, Duéñez-Guzmán E, Dorigo M, Wenseleers T (2015) Evolution of Self-Organized Task Specialization in Robot Swarms. *PLoS Comput Biol* 11(8): e1004273. doi: [10.1371/journal.pcbi.1004273](https://doi.org/10.1371/journal.pcbi.1004273) PMID: [26247819](https://pubmed.ncbi.nlm.nih.gov/26247819/)

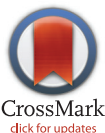

## OPEN ACCESS

**Citation:** The PLOS Computational Biology Staff (2016) Correction: Evolution of Self-Organized Task Specialization in Robot Swarms. *PLoS Comput Biol* 12(6): e1004996. doi:10.1371/journal.pcbi.1004996

**Published:** June 16, 2016

**Copyright:** © 2016 The PLOS Computational Biology Staff. This is an open access article distributed under the terms of the [Creative Commons Attribution License](https://creativecommons.org/licenses/by/4.0/), which permits unrestricted use, distribution, and reproduction in any medium, provided the original author and source are credited.
